# Supplementary material for: A Zebrafish Model for a Rare Genetic Disease Reveals a Conserved Role for FBXL3 in the Circadian Clock System
Source: MDPI journal article supplement (doi:10.3390/ijms23042373), 2022-02-21
Supplement: s1 [file s1]

Supplementary Table S1: Homozygous variants identified by exome sequencing

| No. | Chromosomal Position | dbSNP       | RefSeq            | Gene    | HGVSc     | HGVSp       | GERP   | CADD score | GnomAD Allele Frequency |
|-----|----------------------|-------------|-------------------|---------|-----------|-------------|--------|------------|-------------------------|
| 1   | Chr10:131973139      | rs753281821 | NM_006541.5       | GLRX3   | c.833A>G  | p.Tyr278Cys | 1.41   | 23.7       | 0.000003979             |
| 2   | Chr10:135106153      | rs202119147 | NM_001256617.1    | TUBGCP2 | c.1148C>T | p.Thr383Met | 4.87   | 22.6       | 0.0003404               |
| 3   | Chr11:6976932        | rs762715444 | NM_013250.4       | ZNF215  | c.724A>G  | p.Ile242Val | -0.029 | 8.862      | 0.00000997              |
| 4   | Chr11:7712586        | -           | NM_198185.6       | OVCH2   | c.1553C>T | p.Ser518Phe | 5.62   | 23.7       | 0                       |
| 5   | Chr13:77581816       | -           | NM_012158.4       | FBXL3   | c.751C>T  | p.Arg251Ter | 5.14   | 37         | 0                       |
| 6   | Chr14:22938606       | -           | ENST00000535880.2 | TRDV3   | c.1A>G    | p.Met1?     | -      | 21.8       | 0                       |
