# Supplementary material for: A Zebrafish Model for a Rare Genetic Disease Reveals a Conserved Role for FBXL3 in the Circadian Clock System
Source: Int J Mol Sci. 2022 Feb 21;23(4):2373. doi: 10.3390/ijms23042373 (PMC8875760; doi:10.3390/ijms23042373)
Supplement: Supplementary file 1 [file ijms-23-02373-s001.zip]

Archive with 7 entries (7 files):
- Figure S1. Zebrafish fbxl3a genomic structure and loss-of-function mutation.pdf
- Figure S2. Morphological measurements of zebrafish.pdf
- Figure S3. Expression of HA-tagged FBXL3a in zebrafish fbxl3a-deficient cells.pdf
- Table S1. Homozygous variants identified by exome sequencing.pdf
- Table S2. Zebrafish morphological measurements description.xlsx
- Table S3. Zebrafish morphological measurements.xlsx
- Text S1. Detailed Clinical evaluation.pdf
