# Supplementary material for: A Zebrafish Model for a Rare Genetic Disease Reveals a Conserved Role for FBXL3 in the Circadian Clock System
Source: Int J Mol Sci. 2022 Feb 21;23(4):2373. doi: 10.3390/ijms23042373 (PMC8875760; doi:10.3390/ijms23042373)
Supplement: Supplementary file 1 [file ijms-23-02373-s001.zip › Table S2. Zebrafish morphological measurements description.xlsx]

## Sheet: גיליון1
Measurement	Abbreviation	Aspect	Description
Standard body length	SL	Lateral view	From the anterior edge of the premaxilla to end of the notocord plexus\edge of the posteriormost hypural
Body depth	BD	Lateral view	Dorso-ventral extent at anteriormost part of the pectoral fin
Body width	BW	Dorsal view	Lateral extent between anteriormost part of the pectoral fins
Head length	HL	Lateral view	From the anterior edge of the premaxilla to posteriormost point in the supratemporal
Head depth	HH	Lateral view	Dorso-ventral extent at sphenotics, posterior to the eyes
Head width	HW	Dorsal view	Lateral extent between the sphenotics, posterior to the eyes
Eye size	ES	Lateral view	Maximal length
Caudal peduncle depth	CPD	Lateral view	Shortest dorso-ventral extent at the caudal peduncle
Dorsal fin length	DFL	Lateral view	Anterior-posterior extent between the bases of the first dorasl ray to the last dorsal ray
Ventral fin length	VFL	Lateral view	Anterior-posterior extent between the bases of the first anal ray to the last anal ray
Pelvic fin length	PFL	Lateral view	Anterior-posterior extent between the bases of the first pelvic ray to the last pelvic ray
Pectoral fin length	PcFL	Lateral view	From the postcleithrum to the longest pectoral fin ray
Pectoral girdle length	PGL	Lateral view (C&S)	From the dorsal part of the supracleithrum bone to the ventral point of the cleithrum
Maxilla length	ML	Lateral view (C&S)	From anteriormost part to the posteriormost part of the maxilla
Ascending processus of Maxilla length	APML	Dorsal view (C&S)	From anteriormost part of the premaxilla to the posteriormost part of the ascending processus
Premaxilla length	PmL	Lateral view (C&S)	From anteriormost part to the posteriormost part of the premaxilla
Lower jaw length 1	LJL	Lateral view (C&S)	From the articular\quadrat joint to anteriormost part of the dentary
Lower jaw length 2	LJL2	Lateral view (C&S)	From the articular\quadrat joint to the most ventral point in the articular
Lower jaw depth	LJD	Lateral view (C&S)	From the anteriormost part of the dentary to dorsal tip of the dentary
Lower jaw width	LJW	Ventral view (C&S)	Lateral extent between the articular\quadrat joints
Ceratohyal length (one side)	CHL	Ventral view (C&S)	Right side of the hyoid arch, from base of the basihyal to the posteriormost point of ceratohyal
Basihyal length	BHL	Ventral view (C&S)	From base of the basihyal to the anteriormost point of the ossified basihyal
