# Supplementary material for: A Zebrafish Model for a Rare Genetic Disease Reveals a Conserved Role for FBXL3 in the Circadian Clock System
Source: Int J Mol Sci. 2022 Feb 21;23(4):2373. doi: 10.3390/ijms23042373 (PMC8875760; doi:10.3390/ijms23042373)
Supplement: Supplementary file 1 [file ijms-23-02373-s001.zip › Table S3. Zebrafish morphological measurements.xlsx]

## Sheet: Table 2
Trait name	Wild type (WT)	fbxl3a homozygous (fbxl3-/-)	Linear models r²	DF (group)	DF (individuals)	F - value	P- value
	trait average	trait average
Standard body length	33.08±1.6	32.98±1.4	0.000154	1	13	0.002	0.965
Body depth	7.06±0.36	6.86±0.25	0.0175	1	13	0.231	0.639
Body width	4.77±0.25	4.68±0.22	0.0052	1	13	0.0679	0.799
Head length	8.96±0.35	8.93±0.38	0.000189	1	13	0.002	0.961
Head depth	5.569±0.18	5.53±0.22	0.000802	1	13	0.01	0.92
Head width	5.02±0.14	4.88±0.18	0.0214	1	13	0.285	0.603
Eye size	2.84±0.08	2.81±0.08	0.00407	1	13	0.053	0.821
Caudal peduncle depth	3.78±0.17	3.78±1.3	2.37e-06	1	13	3.08e-05	0.996
Dorsal fin length	5.83±0.46	5.37±0.33	0.0489	1	13	0.669	0.428
Ventral fin length	5.51±0.25	5.45±0.42	0.000991	1	13	0.0129	0.911
Pelvic fin length	4.05±0.21	3.99±0.17	0.00292	1	13	0.0381	0.848
Pectoral fin length	6.83±0.44	6.56±0.27	0.0234	1	13	0.311	0.586
Pectoral girdle length	2.7±0.21	2.98±0.13	0.0963	1	13	1.38	0.26
Maxilla length	1.01±0.04	1.03±0.05	0.00334	1	13	0.0436	0.838
Ascending processus of Maxilla length	0.31±0.02	0.33±0.01	0.0621	1	13	0.861	0.37
Premaxilla length	0.91±0.04	0.93±0.09	0.00278	1	13	0.0362	0.852
lower jaw length 1	1.37±0.06	1.25±0.15	0.0293	1	13	0.392	0.542
lower jaw length 2	0.81±0.04	0.91±0.06	0.102	1	13	1.48	0.245
lower jaw depth	0.15±0.01	0.25±0.09	0.0527	1	13	0.724	0.41
Lower jaw width	1.5±0.04	1.57±0.04	0.0762	1	13	1.07	0.319
Ceratohyal length (one side)	1.38±0.08	1.35±0.05	0.00616	1	13	0.0806	0.781
Basihyal length	0.59±0.04	0.63±0.03	0.0366	1	13	0.494	0.494
